# Supplementary material
Source: PubMed Central journal article supplement (PMC7614341)
Supplement: EMS171063-supplement-Supplementary_Figures_and_Table.pdf [file EMS171063-supplement-Supplementary_Figures_and_Table.pdf]

Supplementary Figure 1: Immature VLPs assemble at 100-fold lower IP6 concentrations than mature capsids

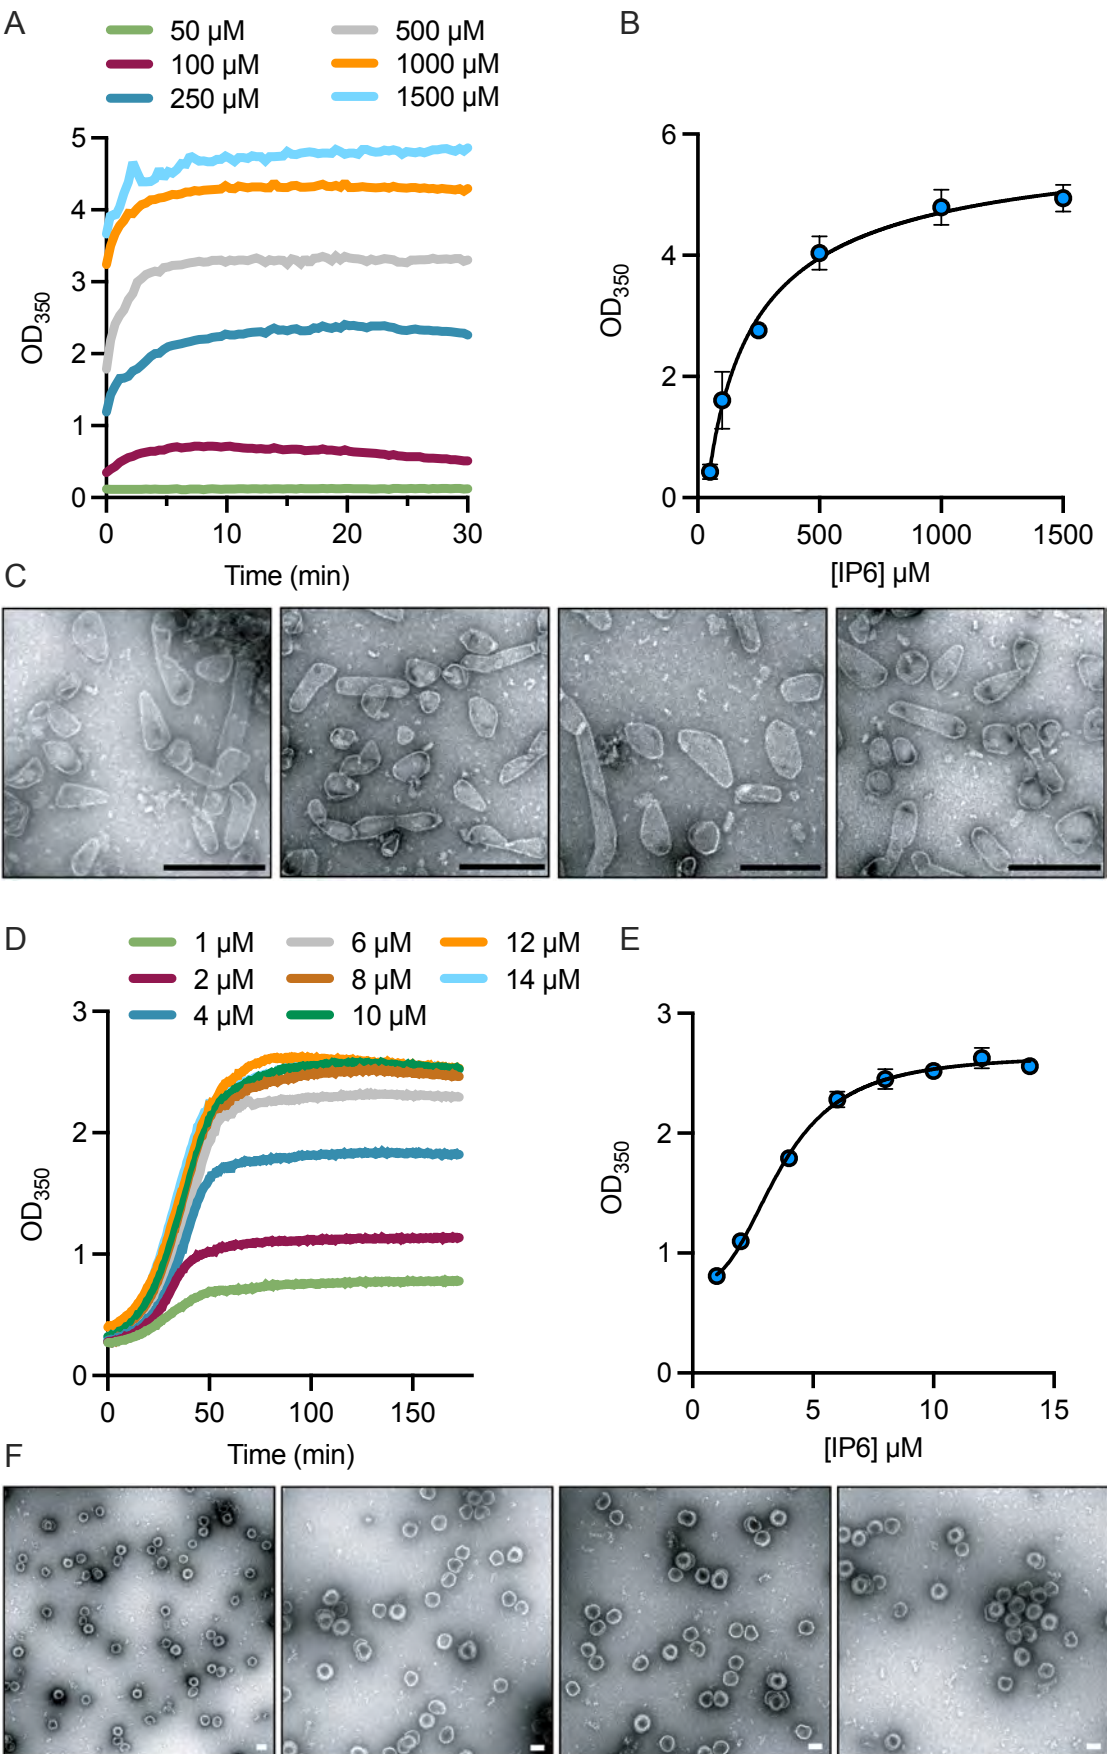

Supplementary Figure 2: Gag processing of WT HIV-1 produced in cells with different IP profiles

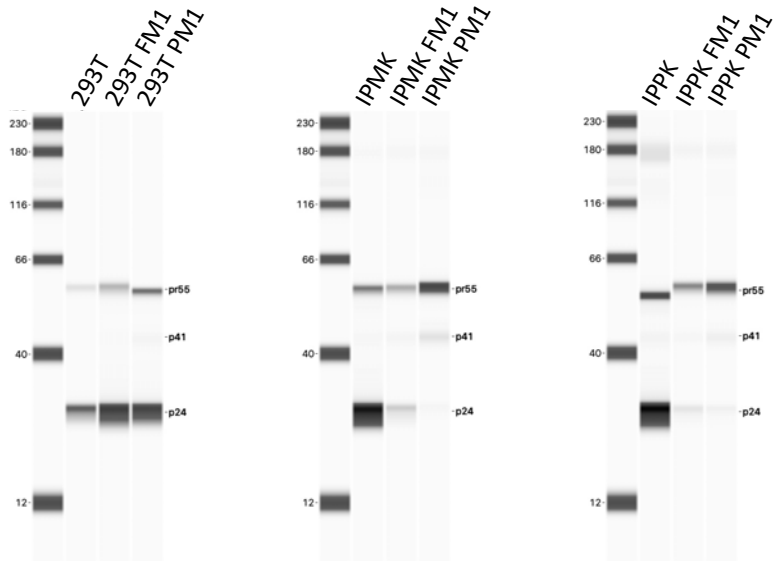

Supplementary Figure 3: In vitro assembly kinetics of immature particles using different IPs

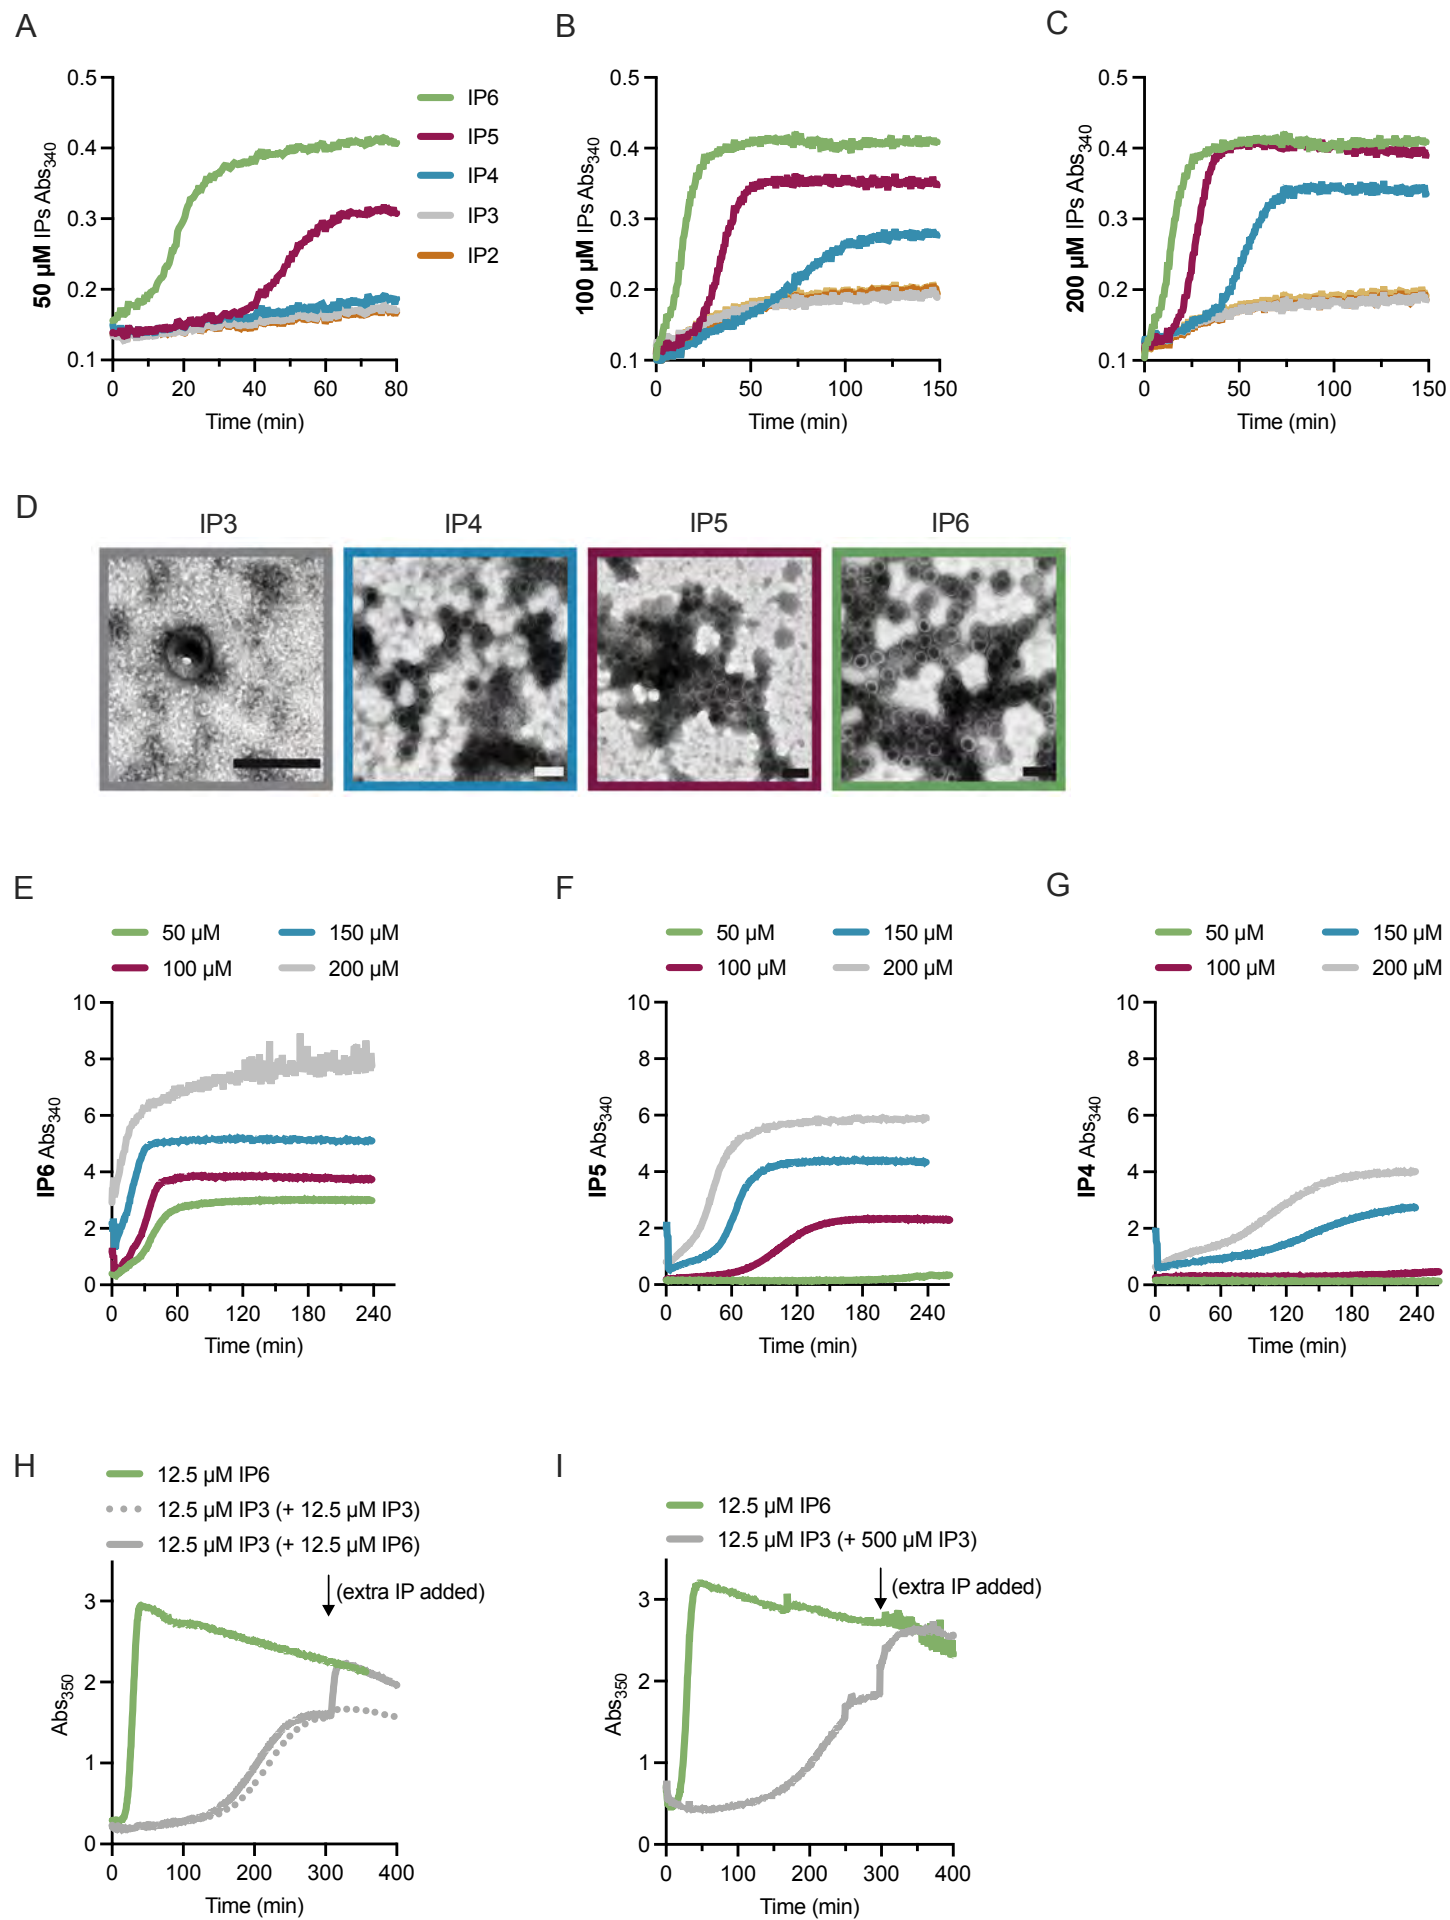

Supplementary Figure 4: Schematic of Gag processing by HIV-1 protease

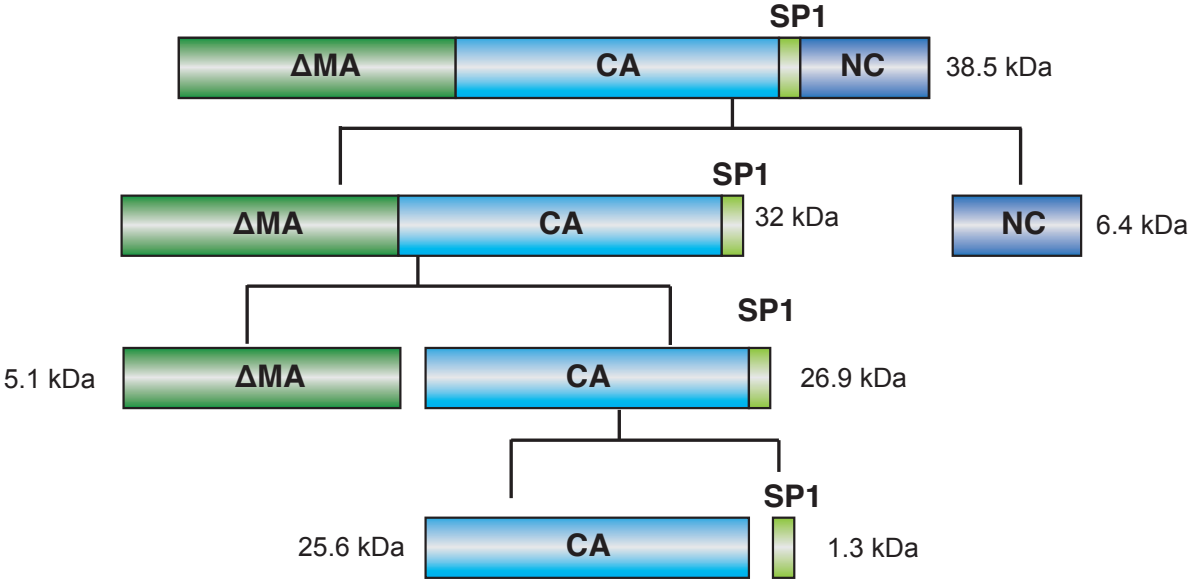

# Supplementary Figure 5: IP6 binding to immature hexamers

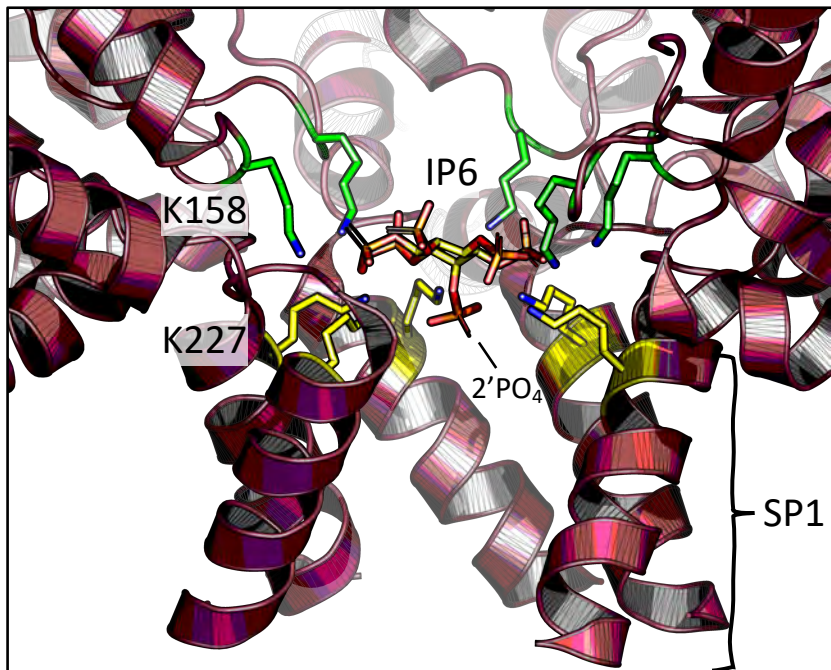

# Supplementary Figure 6: Gag processing of HIV-1 mutants

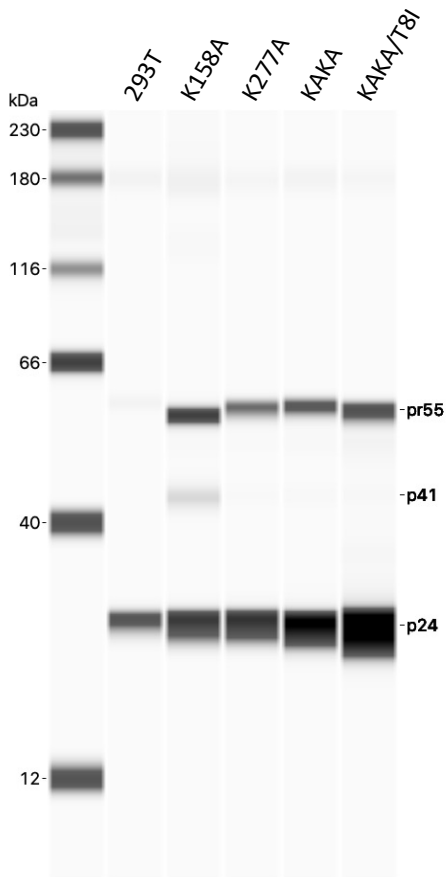

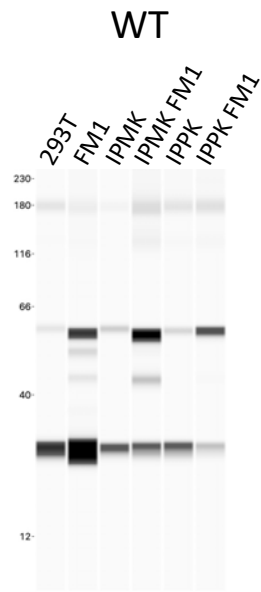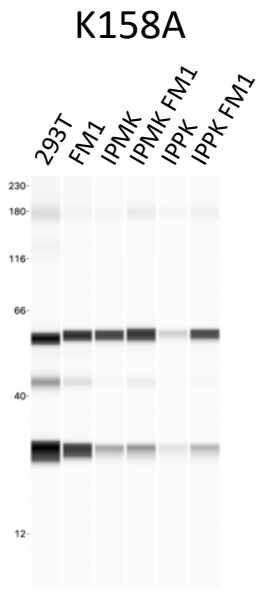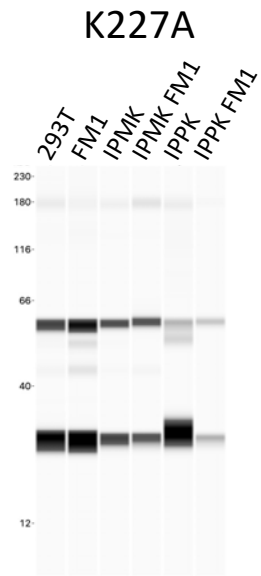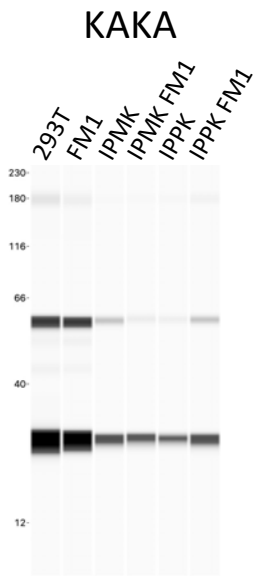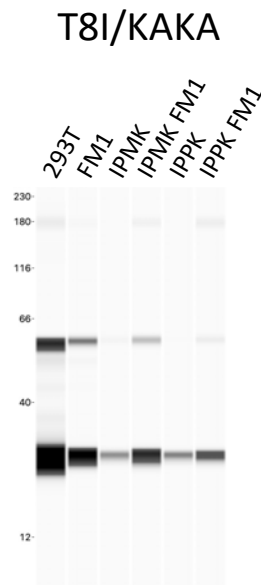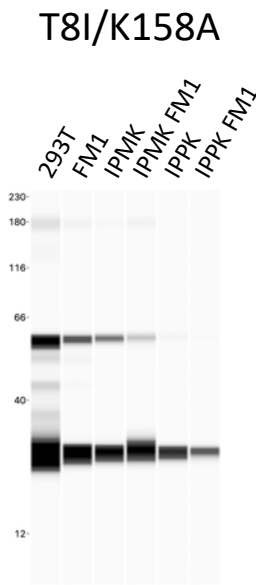

Supplementary Figure 8: TIRF microscopy on WT or D25A protease mutant virions

A

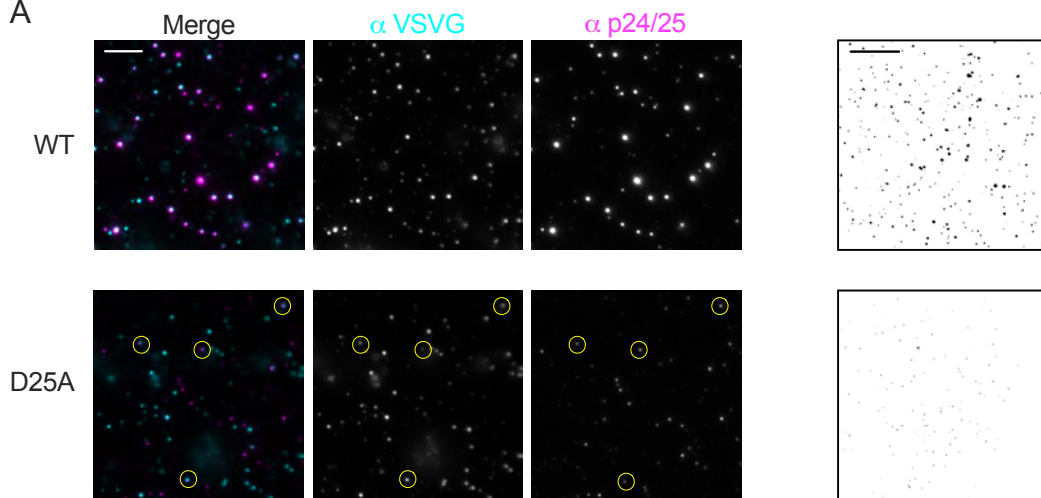

B

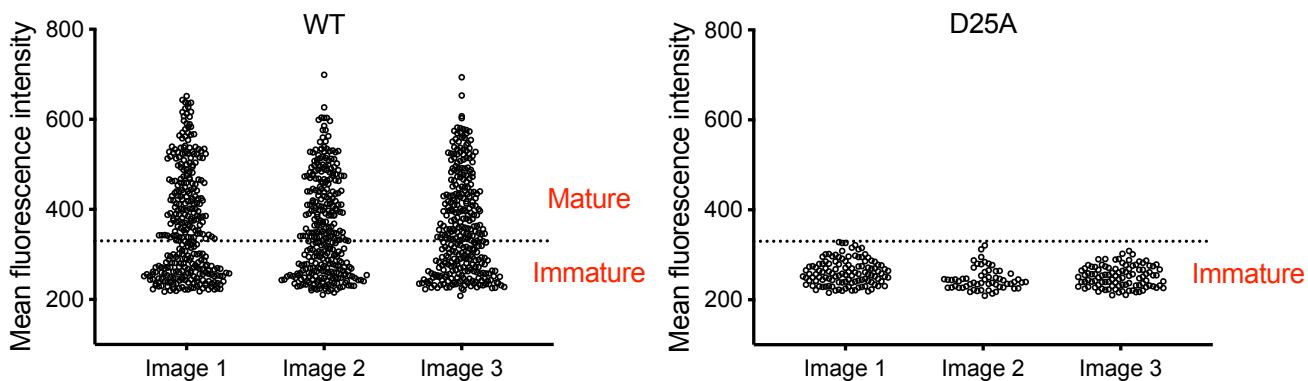

C

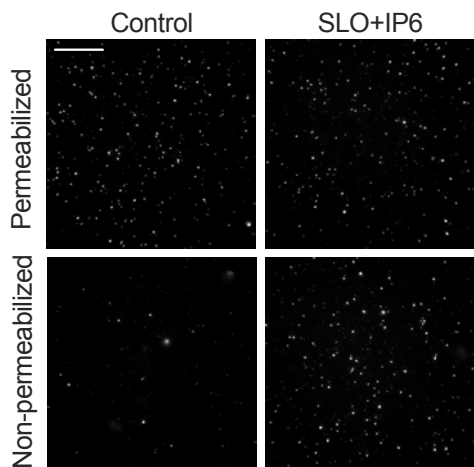

D

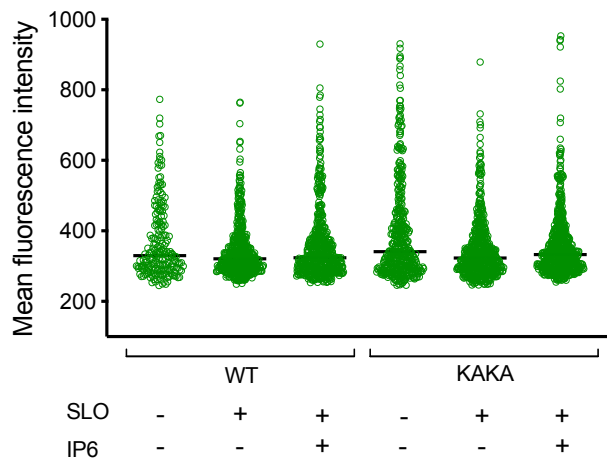



**Supplementary Table 1: Calculated IP5 and IP6 levels in modified 293T cell lines.**

|                 | <b>293T*</b> | <b>IPMK KO*</b> | <b>IPMK KO +<br/>FM1*</b> | <b>IPPK KO*</b> | <b>IPPK KO +<br/>FM1*</b> |
|-----------------|--------------|-----------------|---------------------------|-----------------|---------------------------|
| IP6             | 30           | 5.0             | 0.5                       | 0.44            | 0.08                      |
| I(1,3,4,5,6)P5  | 3            | 0.1             | 0.03                      | 5.2             | 0.06                      |
| I(1,2,4,5,6)P5  | 1            | 0.18            | 0.1                       | 0.08            | 0.05                      |
| Total (IP5+IP6) | 34           | 5.28            | 0.63                      | 5.72            | 0.19                      |

*\*Concentrations are in  $\mu\text{M}$*
